# Supplementary material for: Impact of Therapy on Recovery during Rehabilitation in Patients with Traumatic Spinal Cord Injury
Source: PubMed Central journal article supplement — J Neurotrauma. 2017 Oct 15;34(20):2901–9. doi: 10.1089/neu.2016.4932 (PMC5652980; doi:10.1089/neu.2016.4932), 2017-10-15
Supplement: Supp_Data.pdf [file Supp_Data.pdf]

## Supplementary Data

# Supplementary Material: Techniques

### Methods

To determine the best fitted regression modeling for examining the effect of hours of therapy on motor FIM change, a series of statistical analytical techniques was applied starting with a non-parametric version of linear regression that is part of the generalized additive model (GAM).<sup>1</sup>

### GAM

Suppose that  $Y$  is a response random variable and  $X_1, \dots, X_p$  is a set of predictor variables. A regression procedure can be viewed as a method for estimating how the value of  $Y$  depends on the values of  $X_1, \dots, X_p$ . Given a sample of values for  $Y$  and  $X$ , estimates of  $\beta_0, \beta_1, \dots, \beta_n$  are often obtained by the least squares method. One of the most commonly used statistical models in medical research is the multiple linear regressions for continuous data. It is used here as a specific illustration of a GAM. Linear regression models (and many other techniques) illustrate the effects of independent variables  $\chi_i$  in terms of a linear predictor of the form  $\sum x_j \beta_j$ , where  $\beta_j$  are parameters. The GAM replaces  $\sum x_j \beta_j$  with  $\sum f_j(x_j)$  where  $f_j$  is a non-parametric function. This function is estimated in a flexible manner using a scatter plot smoother. The estimated function  $\hat{f}_j(x_j)$  can reveal possible nonlinearity in the effect of the  $x_j$ . In this application,  $y$  is a response or outcome variable (motor FIM change), and  $x$  is an independent factor (hour of rehabilitation). We want to fit a smooth curve  $f(x)$  that summarizes the dependence of  $y$  on  $x$ . We seek the function  $f(x)$  that minimizes

$$\sum (y_i - f(x_i))^2 + \lambda \int f''(x)^2 \quad (1)$$

Notice that  $\int f''(x)^2$  measures the “curvature” of the function  $f$ ;  $\lambda$  is a nonnegative smoothing parameter that has a direct relation with “degree of freedom (df),” and numerical search should be used to determine the value of  $\lambda$ .<sup>2</sup>

Table S1 provides analytical results from the GAM, including estimation for the linear part of the model and smoothing components. Variables AIS A, AIS B, and high cervical were found to have a significant relationship with motor FIM change, in that patients with any of these injury characteristics would have experienced less motor FIM change. The variable pneumonia was marginally statis-

tically significant. Analysis of deviance indicated that total hour of therapy had a nonlinear statistically significant effect on FIM change. This model was the final model after testing nonlinearity on age and rehabilitation onset. Generalized cross validation was used to choose degree of freedom. Based on the general trend in the smoothing component plot, a second-order polynomial regression of total hour of therapy was used next.

### Generalized linear models

To determine whether linear term (THT) or quadratic term of total hour of therapy (THT + THT<sup>2</sup>) would provide more accurate modeling, two generalized linear models (GLM) with each term were compared using lack-of-fit criteria. Results indicated (partial F-test=21,  $p=0.001$ ) that the quadratic form should be used, from which similar to results from GAM, AIS A, AIS B, high cervical, pneumonia, and THT were found to be significant variables (Table 3).

Analysis was repeated for the AIS D subgroup because pattern-based analysis revealed that this group had a different pattern of motor FIM improvement than the other groups. Table S2 shows that, similar to the results for the entire group, total hour of therapy had a nonlinear relation with outcome ( $p=0.0099$ ). Nonlinear form for all continuous variables (age and rehabilitation onset) was applied, but only total hours of therapy remained significant.

A similar trend in the smoothing component plot was also observed for the AIS D subgroup, and second-order polynomial regression of total hour of therapy was used in the regression model. In a similar comparison with the lack-of-fit criteria between a GLM model with the linear term of the variable and that with the quadratic form (Table 4), results indicated (partial F-test=6.1,  $p=0.015$ ) that the quadratic form of model should be used. Further, results from the regression model showed that both linear and quadratic form should be used for prediction of outcome ( $p=0.001$ ) and that the effect of time for patients with AIS D was stronger than whole sample ( $\beta=0.61$  vs.  $\beta=0.40$ ).

### References

1. Hastie, T., and Tibshirani, R. (1990). Exploring the nature of covariate effects in the proportional hazards model. *Biometrics* 46, 1005–1016.
2. Hastie, T., Tibshirani, R., and Friedman, J. (2009). *The elements of statistical learning*. New York, NY: Springer New York.

SUPPLEMENTARY TABLE 1. GENERALIZED ADDITIVE MODEL FOR AMERICAN SPINAL  
INJURY ASSOCIATION IMPAIRMENT SCALE A,B,C,D GROUPS

| <i>Parameter</i>                                                     | <i>Outcome—Motor FIM change</i> |                       |                |                    |
|----------------------------------------------------------------------|---------------------------------|-----------------------|----------------|--------------------|
|                                                                      | <i>Parameter estimate</i>       | <i>Standard error</i> | <i>t value</i> | <i>Pr &gt;  t </i> |
| Intercept                                                            | 33.79                           | 6.99                  | 4.83           | < 0.0001           |
| Age at injury                                                        | -0.07                           | 0.06                  | -1.10          | 0.27               |
| Gender                                                               |                                 |                       |                |                    |
| Female                                                               | 1.38                            | 3.09                  | 0.45           | 0.6550             |
| Male (reference)                                                     | -                               | -                     | -              | -                  |
| ASIA Impairment Scale (AIS)                                          |                                 |                       |                |                    |
| AIS A                                                                | -12.47                          | 3.59                  | -3.48          | <b>0.0006</b>      |
| AIS B                                                                | -12.55                          | 4.53                  | -2.77          | <b>0.0061</b>      |
| AIS C                                                                | 2.87                            | 3.53                  | 0.81           | 0.4166             |
| AIS D (reference)                                                    | -                               | -                     | -              | -                  |
| Neurological level of injury                                         |                                 |                       |                |                    |
| High cervical (C1–4)                                                 | -10.86                          | 3.08                  | -3.53          | <b>0.0005</b>      |
| Low cervical (C5–8)                                                  | -3.86                           | 3.13                  | -1.24          | 0.2176             |
| Thoracolumbar (T1–S5) (reference)                                    | -                               | -                     | -              | -                  |
| Pressure ulcer                                                       |                                 |                       |                |                    |
| Yes                                                                  | 2.56                            | 2.69                  | 0.95           | 0.34               |
| No (reference)                                                       | -                               | -                     | -              | -                  |
| Pneumonia                                                            |                                 |                       |                |                    |
| Yes                                                                  | -8.45                           | 4.39                  | -1.92          | 0.0557             |
| No (reference)                                                       | -                               | -                     | -              | -                  |
| Urinary tract infection                                              |                                 |                       |                |                    |
| Yes                                                                  | 1.92                            | 2.50                  | -0.77          | 0.4426             |
| No (reference)                                                       | -                               | -                     | -              | -                  |
| Rehabilitation onset                                                 | -0.04                           | 0.02                  | -1.72          | 0.0872             |
| Total hours of therapy - linear                                      | 0.07                            | 0.02                  | 3.14           | <b>0.0019</b>      |
| <i>Component</i>                                                     | <i>Smoothing parameter</i>      | <i>DF</i>             | <i>GCV</i>     | <i>Num</i>         |
| <i>Smoothing Model Analysis—Fit Summary for Smoothing Components</i> |                                 |                       |                |                    |
| Spline (total hours of therapy)                                      | 0.999971                        | 5                     | 273.46598      | 245                |
| <i>Source</i>                                                        |                                 | <i>DF</i>             | <i>F Value</i> | <i>Fr&gt;F</i>     |
| <i>Smoothing Model Analysis—Approximate Analysis of Deviance</i>     |                                 |                       |                |                    |
| Spline (total hours of therapy)                                      |                                 | 5                     | 9.59           | <0.0001            |

FIM, Functional Independence Measure; ASIA, American Spinal Injury Association; AIS, American Spinal Injury Association (ASIA) Impairment Scale; DF, degree of freedom; GCV, generalized cross validation.

SUPPLEMENTARY TABLE 2. GENERALIZED ADDITIVE MODEL FOR AMERICAN SPINAL INJURY ASSOCIATION  
IMPAIRMENT SCALE D GROUP

| <i>Parameter</i>                                                     | <i>Outcome—Motor FIM Change</i> |                       |                |                    |
|----------------------------------------------------------------------|---------------------------------|-----------------------|----------------|--------------------|
|                                                                      | <i>Parameter estimate</i>       | <i>Standard error</i> | <i>t value</i> | <i>Pr &gt;  t </i> |
| Intercept                                                            | 22.99                           | 6.76                  | 3.40           | 0.0008             |
| Age at injury                                                        | 0.0005                          | 0.06                  | 0.01           | 0.9937             |
| Gender                                                               |                                 |                       |                |                    |
| Female                                                               | 0.54                            | 3.22                  | 0.17           | 0.8658             |
| Male (reference)                                                     | -                               | -                     | -              | -                  |
| Neurological level of injury                                         |                                 |                       |                |                    |
| High cervical (C1–4)                                                 | -7.85                           | 2.99                  | -2.63          | <b>0.0092</b>      |
| Low cervical (C5–8)                                                  | -2.47                           | 2.97                  | -0.83          | 0.4057             |
| Thoracolumbar (T1–S5) (reference)                                    | -                               | -                     | -              | -                  |
| Pressure ulcer                                                       |                                 |                       |                |                    |
| Yes                                                                  | -1.43                           | 2.66                  | -0.54          | 0.5913             |
| No (reference)                                                       | -                               | -                     | -              | -                  |
| Pneumonia                                                            |                                 |                       |                |                    |
| Yes                                                                  | -9.94                           | 4.57                  | -2.17          | <b>0.0309</b>      |
| No (reference)                                                       | -                               | -                     | -              | -                  |
| Urinary tract infection                                              |                                 |                       |                |                    |
| Yes                                                                  | -0.47                           | 2.54                  | -0.19          | 0.8527             |
| No (reference)                                                       | -                               | -                     | -              | -                  |
| Rehabilitation onset                                                 | -0.06                           | 0.02                  | -2.51          | <b>0.0126</b>      |
| Total hours of therapy - linear                                      | 0.05                            | 0.02                  | 2.60           | <b>0.0099</b>      |
| <i>Component</i>                                                     | <i>Smoothing parameter</i>      | <i>DF</i>             | <i>GCV</i>     | <i>Num</i>         |
| <i>Smoothing Model Analysis—Fit Summary for Smoothing Components</i> |                                 |                       |                |                    |
| Spline (total hours of therapy)                                      | 0.999953                        | 7.5                   | 305.18626      | 245                |
| <i>Source</i>                                                        |                                 | <i>DF</i>             | <i>F Value</i> | <i>Fr&gt;F</i>     |
| <i>Smoothing Model Analysis—Approximate Analysis of Deviance</i>     |                                 |                       |                |                    |
| Spline (total hours of therapy)                                      |                                 | 7.5                   | 5.97           | < 0.0001           |

FIM, Functional Independence Measure; ASIA, American Spinal Injury Association; AIS, American Spinal Injury Association (ASIA) Impairment Scale; DF, degree of freedom; GCV, generalized cross validation.
